# Supplementary material for: Single-Step Fabrication of Au-Fe-BaTiO3 Nanocomposite Thin Films Embedded with Non-Equilibrium Au-Fe Alloyed Nanostructures
Source: MDPI journal article supplement (doi:10.3390/nano12193460), 2022-10-03
Supplement: s1 [file s1]

Supplementary Materials

# Single-Step Fabrication of Au-Fe-BaTiO<sub>3</sub> Nanocomposite Thin Films Embedded with Non-Equilibrium Au-Fe Alloyed Nanostructures

Bethany X. Rutherford <sup>1</sup>, Hongyi Dou <sup>1</sup>, Bruce Zhang <sup>2</sup>, Zihao He <sup>2</sup>, James P. Barnard <sup>1</sup>, Robynne L. Paldi <sup>1</sup> and Haiyan Wang <sup>1,2,\*</sup>

<sup>1</sup> School of Materials Engineering, Purdue University, West Lafayette, IN 47907, USA

<sup>2</sup> School of Electrical and Computer Engineering, Purdue University, West Lafayette, IN 47907, USA

\* Correspondence: hwang00@purdue.edu

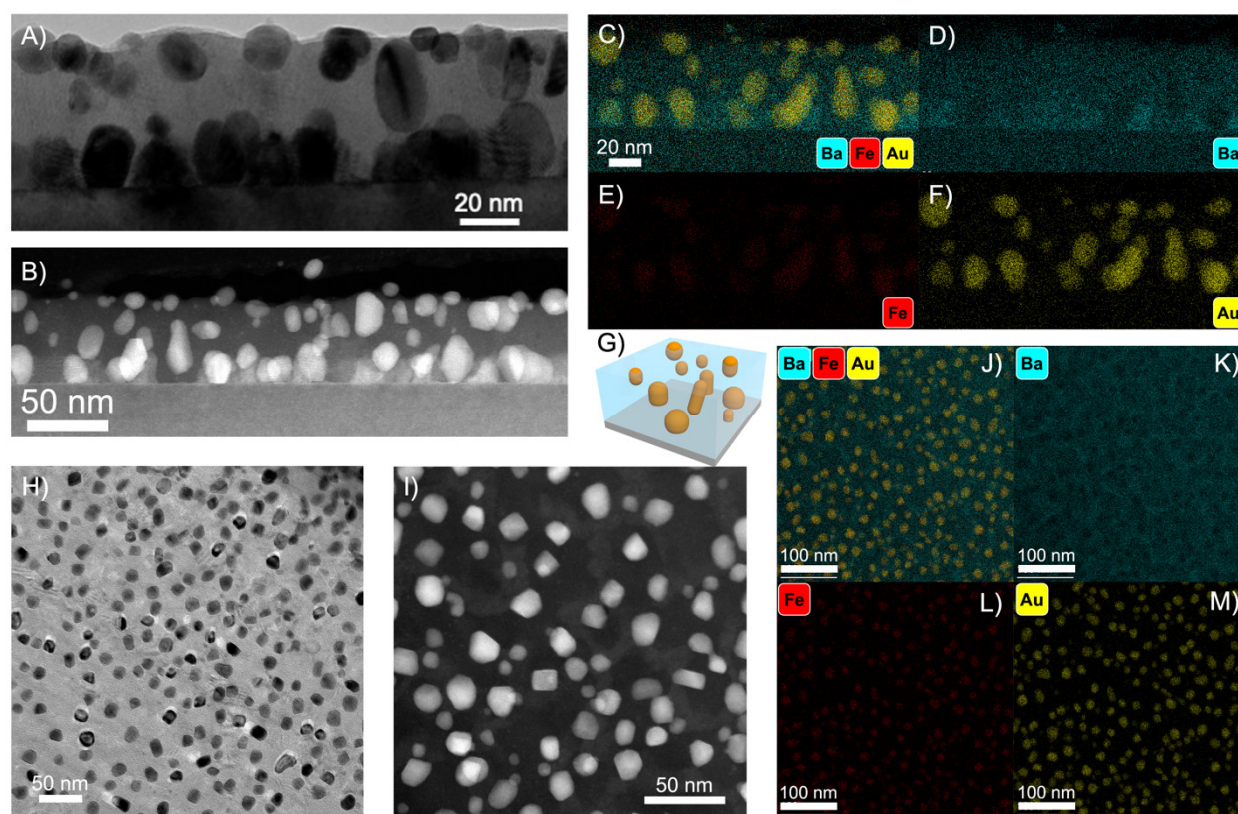

**Figure S1.** 10 Hz sample TEM results: (A) cross-section TEM image, (B) cross-section STEM image, (C) cross-section EDX composite of Ba, Fe, and Au, (D) cross-section EDX of Ba, (E) cross-section EDX of Fe, (F) cross-section EDX of Au, (G) 3D schematic of 10 Hz sample, (H) plan-view TEM image, (I) plan-view STEM image, (J) plan-view EDX composite of Ba, Fe, and Au, (K), EDX composite of Ba, (L) EDX composite of Fe, (M) and EDX composite of Au.

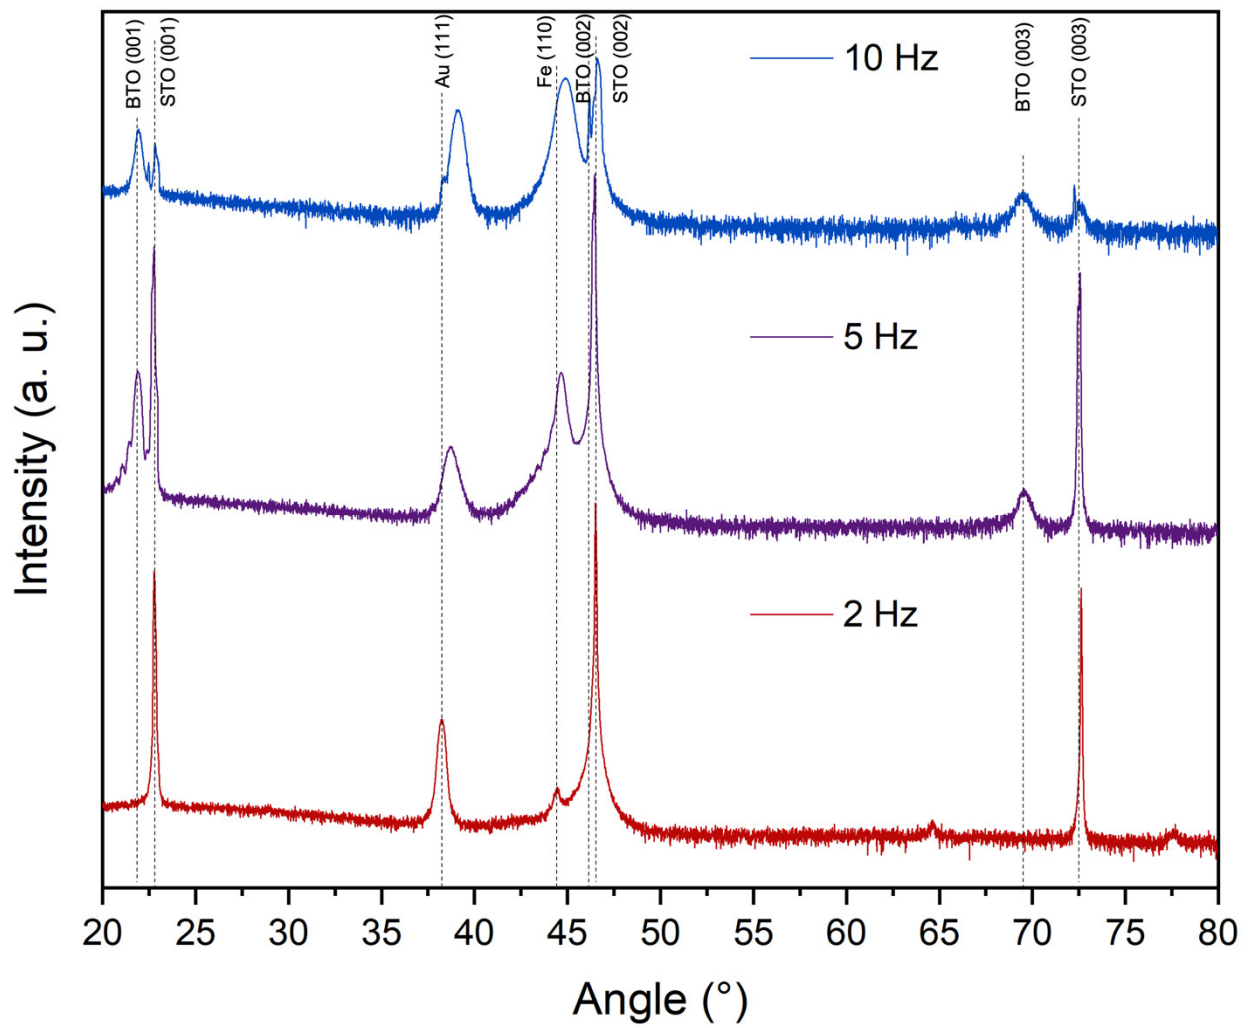

Figure S2. Full XRD spectrum for each sample.

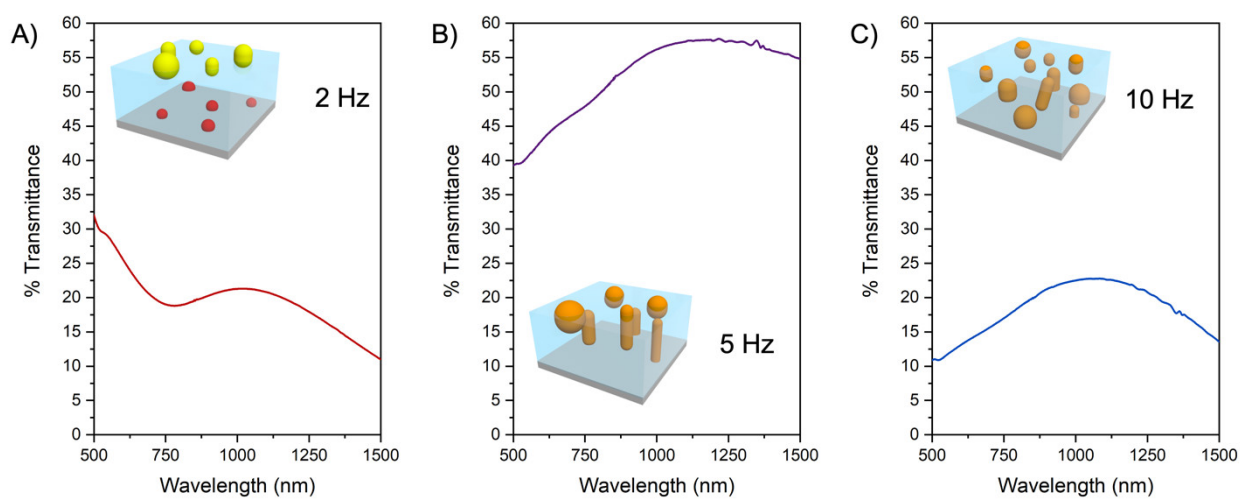

Figure S3. Optical transmittance of the Au-Fe-BTO sample grown at (A) 2 Hz, (B) 5 Hz, (C) and 10 Hz.
